# Supplementary material
Source: PubMed Central journal article supplement (PMC4511599)

# Supplementary Figure 1

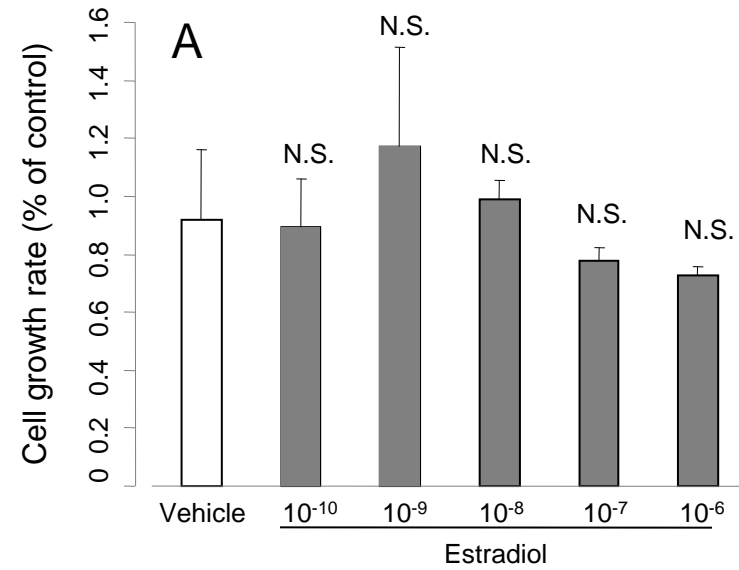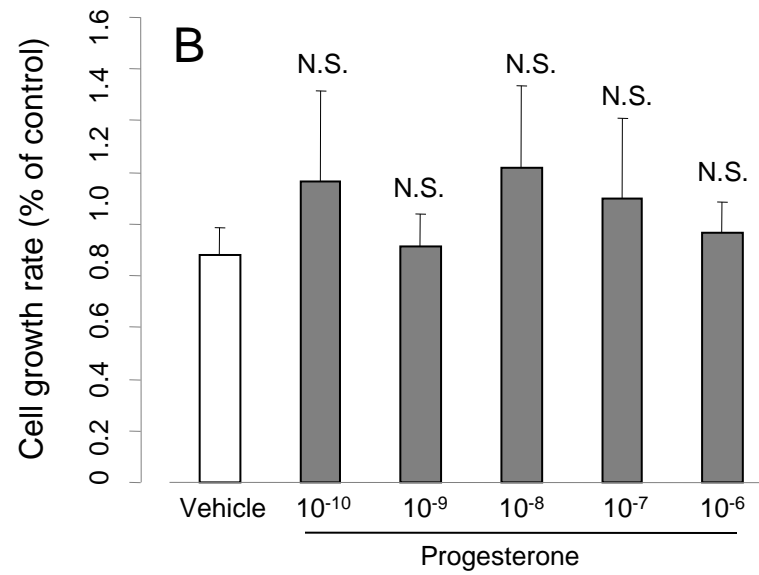

Supplement: NIHMS610444-supplement-Fig_1.pdf [file NIHMS610444-supplement-Fig_1.pdf]

## Supplementary Figure 2

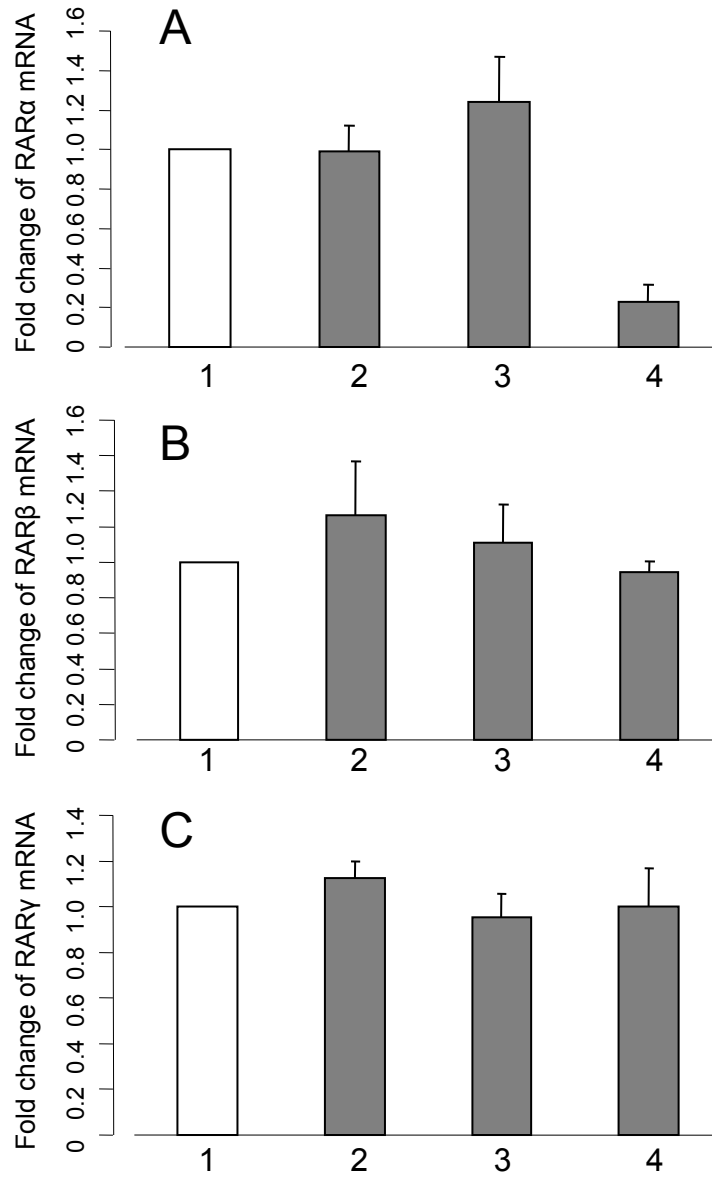

Supplement: NIHMS610444-supplement-Fig_2.pdf [file NIHMS610444-supplement-Fig_2.pdf]

# Supplementary Figure 3

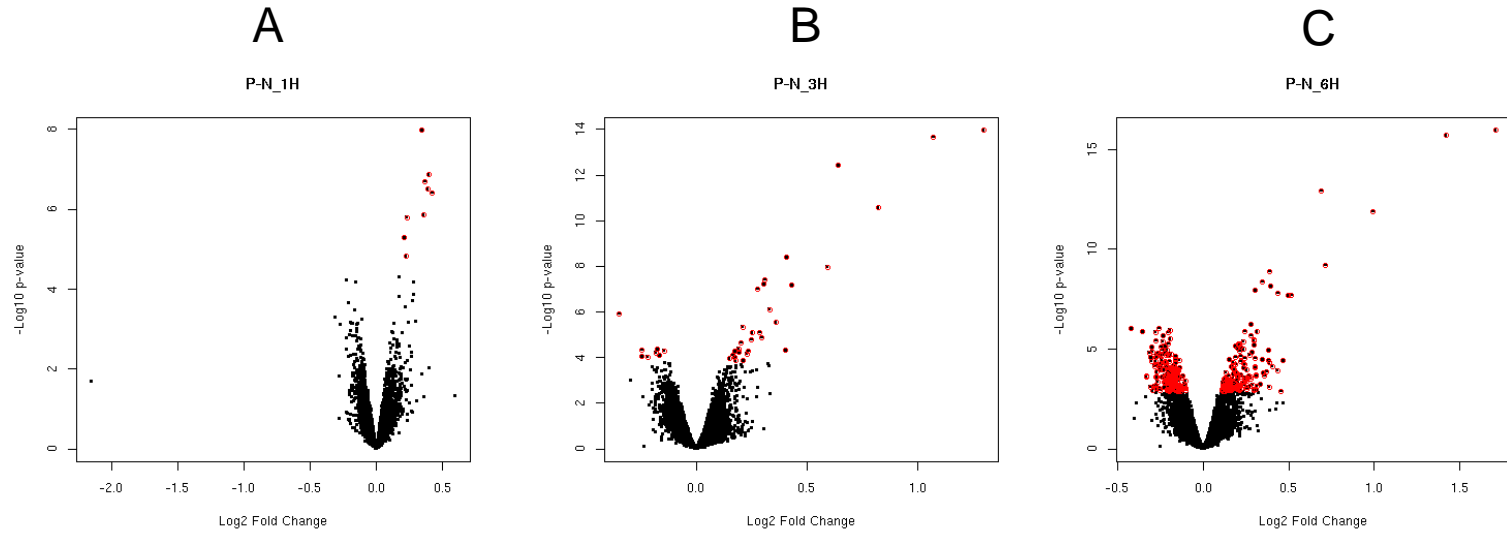

Supplement: NIHMS610444-supplement-Fig_3.pdf [file NIHMS610444-supplement-Fig_3.pdf]
